# Supplementary material for: Crystal Structure-Guided Design of Bisubstrate Inhibitors and Photoluminescent Probes for Protein Kinases of the PIM Family
Source: MDPI journal article supplement (doi:10.3390/molecules26144353), 2021-07-19
Supplement: s1 [file s1]

# Crystal Structure-Guided Design of Bisubstrate Inhibitors and Photoluminescent Probes for Protein Kinases of the PIM Family

Olivier E. Nonga <sup>1</sup>, Darja Lavogina <sup>1</sup>, Erki Enkvist <sup>1</sup>, Katrin Kestav <sup>1</sup>, Apirat Chaikvad <sup>2,3</sup>, Sarah E. Dixon-Clarke <sup>4,5</sup>, Alex N. Bullock <sup>4</sup>, Sergei Kopanchuk <sup>1</sup>, Taavi Ivan <sup>1</sup>, Ramesh Ekambaram <sup>1</sup>, Kaido Viht <sup>1</sup>, Stefan Knapp <sup>2,3</sup> and Asko Uri <sup>1,\*</sup>

<sup>1</sup> Institute of Chemistry, University of Tartu, 14A Ravila St., 50411 Tartu, Estonia; olivier.etebe.nonga@ut.ee (O.E.N.); darja.lavogina@ut.ee (D.L.); erki.enkvist@ut.ee (E.E.); katrin.kestav@ut.ee (K.K.); sergei.kopanchuk@ut.ee (S.K.); taavi.ivan@ut.ee (T.I.); ramcheme@gmail.com (R.E.); Kaido.viht@ut.ee (K.V.)

<sup>2</sup> Institut für Pharmazeutische Chemie, Goethe University Frankfurt am Main, Max-von-Laue-Str. 9, 60438 Frankfurt am Main, Germany; chaikvad@pharmchem.uni-frankfurt.de (A.C.); knapp@pharmchem.uni-frankfurt.de (S.K.)

<sup>3</sup> Structural Genomics Consortium (SGC), Buchmann Institute for Life Sciences, Goethe University Frankfurt, Max-von-Laue-Str. 15, 60438 Frankfurt am Main, Germany

<sup>4</sup> Centre for Medicines Discovery, University of Oxford, Old Road Campus, Roosevelt Drive, Oxford OX3 7DQ, UK; alex.bullock@cmd.ox.ac.uk

<sup>5</sup> Department of Cancer Biology, Dana-Farber Cancer Institute, Longwood Center, 450 Brookline Avenue, Boston, MA 02215, USA; sarah.dixon-clarke@dfci.harvard.edu

\* Correspondence: asko.uri@ut.ee; Tel.: +372-737-5275

## Supplementary Materials:

|                                                                                                                                                     |    |
|-----------------------------------------------------------------------------------------------------------------------------------------------------|----|
| Supplementary Methods.....                                                                                                                          | 3  |
| 1. Synthesis of methyl 3-amino-6-bromothieno[3,2- <i>b</i> ]pyridine-2-carboxylate ( <b>B</b> ).....                                                | 3  |
| 2. Synthesis of 7-bromo-2-(chloromethyl)pyrido[4,5]thieno[3,2- <i>d</i> ]pyrimidin-4-one ( <b>D</b> ).....                                          | 3  |
| 3. General protocol of solid phase synthesis.....                                                                                                   | 3  |
| Supplementary References.....                                                                                                                       | 5  |
| Supplementary Tables.....                                                                                                                           | 6  |
| Table S1. Data collection and refinement statistics of PIM-1/ARC co-crystals.....                                                                   | 6  |
| Table S2. Structural formulae and HRMS data of the novel compounds in the study.....                                                                | 7  |
| Table S3. Selectivity profiling of ARC inhibitors (1 $\mu$ M) towards a panel of PKs.....                                                           | 14 |
| Table S4. HPLC (C18 reversed phase) purity data for the previously unpublished compounds.....                                                       | 19 |
| Supplementary Figures.....                                                                                                                          | 20 |
| Figure S1. 2F <sub>o</sub> -F <sub>c</sub> electron density map contoured at 1 $\sigma$ for the inhibitors in co-crystal structures with PIM-1..... | 20 |
| Figure S2. Specificity of D1D2 antibody to PIM-2 detection.....                                                                                     | 21 |
| Figure S3. Stability of ARC-1451/PIM-2 complex in PC-3 cell lysate.....                                                                             | 22 |
| Figure S4. Time- and concentration-dependence of the cellular uptake of compound <b>6</b> into live U2OS cells.....                                 | 23 |

|                                                                                                                                                                                        |    |
|----------------------------------------------------------------------------------------------------------------------------------------------------------------------------------------|----|
| Figure S5. Comparison of cellular uptake of compound <b>8</b> (labelled with TAMRA) and compound <b>6</b> (labelled with Cy5) into live U2OS cells.....                                | 24 |
| Figure S6. Intracellular localization of compounds labelled with Cy5 and incorporating different number of Arg residues.....                                                           | 26 |
| Figure S7. Biochemical characterization of the synthesized compounds and commercially available inhibitors.....                                                                        | 28 |
| Supplementary Video.....                                                                                                                                                               | 30 |
| Video S1. Colocalization studies of PIM-targeting compound <b>6</b> with fluorescently tagged PIM-1 <i>vs</i> peroxisomal marker (following 48 h transfection) in live U2OS cells..... | 30 |

## Supplementary Methods

### 1. Synthesis of methyl 3-amino-6-bromothieno[3,2-b]pyridine-2-carboxylate (**B**)

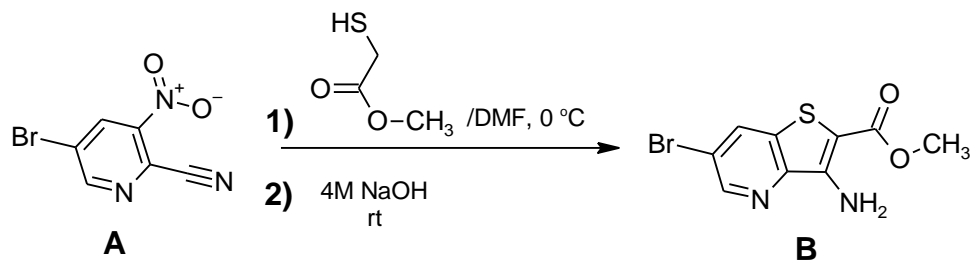

To a cold solution of 5-bromo-3-nitropyridine-2-carbonitrile (**A**, 100 mg, 569  $\mu\text{mol}$ ) in DMF, methyl 2-mercaptoacetate (47  $\mu\text{L}$ , 569  $\mu\text{mol}$ ) was added dropwise at 0 °C. The reaction mixture was stirred at 0 °C for 30 min, and then 4M NaOH aqueous solution (150  $\mu\text{L}$ ) was added dropwise. After stirring at RT for 3 h, the reaction mixture was quenched with ice-water. The resulting precipitate was collected by filtration, washed with ethanol, and dried to yield 70 mg of yellowish solid (yield 43%). The product emitted blue fluorescence as a normal-phase thin-layer chromatography (TLC) spot with  $R_f = 0.5$  (EtOAc/hexane 1:3).  $\text{UV}_{\text{max}}$  at 288 nm and at 374 nm (DMF). MS (ESI)  $m/z$  288 ( $M + H$ )<sup>+</sup>; <sup>1</sup>H NMR (700 MHz, DMSO-*d*<sub>6</sub>)  $\delta$  ppm 3.83 (s, 3H), 6.95 (s, 2H), 8.77 (m, 2H).

### 2. Synthesis of 7-bromo-2-(chloromethyl)pyrido[4,5]thieno[3,2-d]pyrimidin-4-one (**D**)

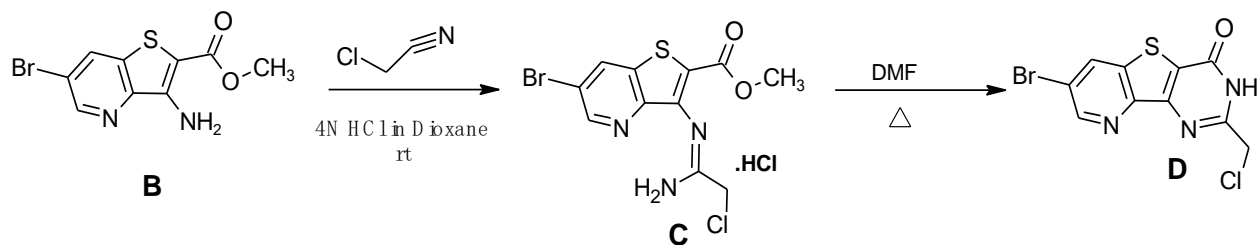

A suspension of methyl-3-amino-6-bromothieno[3,2-*b*]pyridine-2-carboxylate (**B**, 50 mg, 150  $\mu\text{mol}$ ) in 4 N hydrochloric acid in dioxane (2 mL) was treated with 2-chloroacetonitrile (18.5  $\mu\text{L}$ , 300  $\mu\text{mol}$ ) at room temperature for 3 h to yield the intermediate product **C** (51 mg, yield 94%). Then, the reaction mixture was refluxed for 2 h. A white solid was collected by filtration, washed with ethanol, and dried to give the desired product (47 mg; yield 100%). The product did not emit blue fluorescence as a TLC spot with  $R_f = 0.5$  (EtOAc/hexane 1:1).  $\text{UV}_{\text{max}}$  at 262 nm and at 312 nm (DMF). MS (ESI)  $m/z$  332 ( $M + H$ )<sup>+</sup>; <sup>1</sup>H NMR (700 MHz, DMSO-*d*<sub>6</sub>)  $\delta$  ppm: 4.69 (s, 2 H), 8.96 (s, 1H), 9.05 (s, 1H), 13.38 (bs, 1H).

### 3. General protocol of solid phase synthesis

The general protocol was following that in [1].

#### 3.1. ARC-3126 and compound **1**

BPTP (**4**) (1.5 eq.) in DMF and DIPEA (6 eq.) was added to the N-terminal amino group of the corresponding peptide on the resin (1 eq.) and stirred slowly at 60 °C for 8 h. Then, the resin was washed, dried, and the cleavage of the product from the resin followed according to the general protocol.

### 3.2. Compounds 2 and 5

A solution of 7-bromo-2-(chloromethyl)-thieno[2,3-*d*]pyrimidin-4(3*H*)-one (BBTP) (1.5 eq.) in DMF and DIPEA (6 eq.) was added to N-terminal amino group of the corresponding peptide on the resin (1 eq.) and stirred slowly at 60 °C for 8 h. Thereafter, the resin was washed, dried, and the cleavage of the product from the resin followed according to the general protocol.

### 3.3. Compound 3

BBTP (3 eq.) and propargylamine (3 eq.) were dissolved in DMF in the presence of DIPEA (6 eq.) and stirred slowly at 60 °C for 18 h to obtain 8-bromo-2-[(prop-2-ynylamino)methyl]-3*H*-benzothiopheno[3,2-*d*]pyrimidin-4-one, which was used in the next step without further purification. The solution of the latter alkyne-group containing compound (1.5 eq.) in DMF was added to the azido-group containing peptide on the resin (1 eq.) in the presence of DIPEA (100 eq.) and CuI (3 eq.) and stirred slowly at RT for 24 h. Then, the resin was washed, dried, and the cleavage of the product from the resin followed according to the general protocol.

### 3.4. Compound 4

BBTP (3 eq) and sodium azide (3 eq) were dissolved in DMF in the presence of DIPEA (6 eq.) and stirred slowly at 60 °C for 18 h to obtain 2-(azidomethyl)-8-bromo[1]benzothieno[3,2-*d*]pyrimidin-4(3*H*)-one, which was used in the next step without further purification. The solution of the latter azido-group containing compound (1.5 eq.) in DMF was added to the alkyne-group containing peptide on the resin (1 eq.) in the presence of DIPEA (100 eq.) and CuI (3 eq.) and stirred slowly at RT for 24 h. Then, the resin was washed, dried, and the cleavage of the product from the resin followed according to the general procedure.

### 3.5. (D-Arg)<sub>2</sub>-Gly-D-Arg-D-Lys-NH<sub>2</sub> (PIM peptide)

The synthesis of this compound was performed according to the general protocol described above. No linker or adenosine analogue fragment was introduced after removal of the Fmoc group from the N-terminal D-Arg.

### Supplementary References

1. Ekambaram, R.; Enkvist, E.; Vaasa, A.; Kasari, M.; Raidaru, G.; Knapp, S.; Uri, A. Selective Bisubstrate Inhibitors with Sub-Nanomolar Affinity for Protein Kinase Pim-1. *ChemMedChem* **2013**, *8*, 909–913, doi:<https://doi.org/10.1002/cmdc.201300042>.

## Supplementary Tables

Table S1. Data collection and refinement statistics of PIM-1/ARC co-crystals

| Complex                                         | PIM-1-ARC-1411                                                                | PIM-1-ARC-1415                                                                           | PIM-1-ARC-3126                                                               |
|-------------------------------------------------|-------------------------------------------------------------------------------|------------------------------------------------------------------------------------------|------------------------------------------------------------------------------|
| PDB codes                                       | 7OOV                                                                          | 7OOW                                                                                     | 7OOX                                                                         |
| Beamline                                        | Diamond I02                                                                   | Diamond I03                                                                              | Diamond I03                                                                  |
| <i>Data Collection<sup>a</sup></i>              |                                                                               |                                                                                          |                                                                              |
| Resolution (Å)                                  | 48.98-1.96 (2.03-1.96)                                                        | 42.70-1.95 (2.02-1.95)                                                                   | 47.4-1.97 (2.04-1.97)                                                        |
| Space group                                     | <i>P</i> 6 <sub>5</sub>                                                       | <i>P</i> 6 <sub>5</sub>                                                                  | <i>P</i> 6 <sub>5</sub>                                                      |
| Cell dimensions                                 | a=b=98.0, c=80.8 Å<br>α=β=90.0°, γ=120.0°                                     | a=b=98.6, c=80.7 Å<br>α=β=90.0°, γ=120.0°                                                | a=b=94.8, c=80.4 Å<br>α=β=90.0°, γ=120.0°                                    |
| Number of unique reflections                    | 31,721 (3,086)                                                                | 32,555 (3,196)                                                                           | 29,127 (2,853)                                                               |
| Completeness (%)                                | 100.0 (100.0)                                                                 | 99.9 (99.9)                                                                              | 100.0 (100.0)                                                                |
| I/σI                                            | 9.4 (2.0)                                                                     | 11.0 (3.1)                                                                               | 9.4 (2.0)                                                                    |
| R <sub>merge</sub> (%)                          | 0.059 (0.736)                                                                 | 0.099 (0.948)                                                                            | 0.120 (0.679)                                                                |
| CC (1/2)                                        | 0.999 (0.709)                                                                 | 0.995 (0.734)                                                                            | 0.995 (0.759)                                                                |
| Redundancy                                      | 5.6 (5.4)                                                                     | 5.1 (5.0)                                                                                | 5.0 (4.9)                                                                    |
| <i>Refinement</i>                               |                                                                               |                                                                                          |                                                                              |
| Number atoms in refinement (P/L/O) <sup>b</sup> | 2,217/ 104/ 178                                                               | 2,217/ 93/ 231                                                                           | 2,325/ 100/ 275                                                              |
| B factor (P/L/O) <sup>b</sup> (Å <sup>2</sup> ) | 45/ 72/ 51                                                                    | 32/ 51/ 41                                                                               | 27/ 49/ 35                                                                   |
| R <sub>fact</sub> (%)                           | 16.2                                                                          | 16.0                                                                                     | 17.9                                                                         |
| R <sub>free</sub> (%)                           | 19.5                                                                          | 18.4                                                                                     | 22.2                                                                         |
| rms deviation bond <sup>c</sup> (Å)             | 0.014                                                                         | 0.013                                                                                    | 0.014                                                                        |
| rms deviation angle <sup>c</sup> (°)            | 1.4                                                                           | 1.4                                                                                      | 1.5                                                                          |
| <i>Molprobit Ramachandran</i>                   |                                                                               |                                                                                          |                                                                              |
| Favor (%)                                       | 94.65                                                                         | 94.65                                                                                    | 96.09                                                                        |
| Outlier (%)                                     | 0                                                                             | 0                                                                                        | 0                                                                            |
| Crystallization conditions                      | 4 °C, 5.8 mg/mL PIM-1, 22% PEG3350, 0.1 M ammonium sulfate, 0.1 M tris pH 8.5 | 20 °C, 7.0 mg/mL PIM-1, 15% (w/v) PEG 10000, 0.2 M magnesium chloride, 0.1 M tris pH 7.9 | 20 °C, 7.0 mg/mL PIM-1, 1 M ammonium phosphate dibasic, 0.1 M acetate pH 4.5 |

<sup>a</sup> Values in brackets indicate high-resolution shell statistics.

<sup>b</sup> P/L/O indicates protein, ligand and others.

<sup>c</sup> rms indicates root-mean-square.

Table S2. Structural formulae and HRMS data of the new compounds in the study

| Compound | Structure                                                                                                                                                                                                                                                                                                                                                                                                                                                                                                                                                                  | Calculated<br>monoisotopic<br>mass, Da | Experimental<br>deconvoluted<br>HRMS, Da |
|----------|----------------------------------------------------------------------------------------------------------------------------------------------------------------------------------------------------------------------------------------------------------------------------------------------------------------------------------------------------------------------------------------------------------------------------------------------------------------------------------------------------------------------------------------------------------------------------|----------------------------------------|------------------------------------------|
| ARC-1451 | 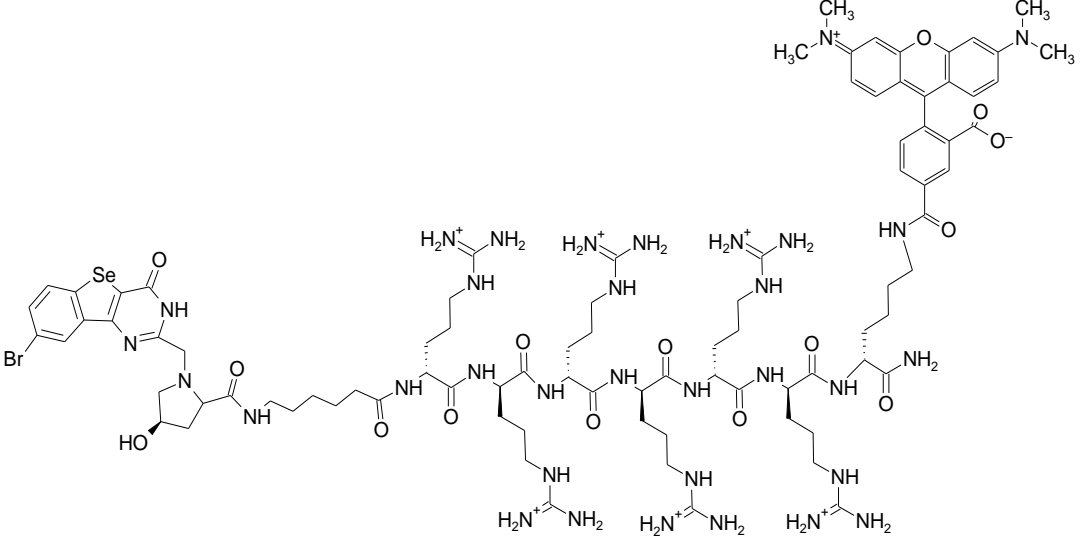 <p>The structure of ARC-1451 is a complex molecule. It features a central peptide backbone consisting of seven amino acid residues: L-lysine, L-lysine, L-lysine, L-lysine, L-lysine, L-lysine, and L-lysine. The N-terminus of the peptide is modified with a 4-(dimethylamino)phenyl group. The C-terminus is linked to a 2-hydroxy-3-(4-bromo-5-(dimethylamino)benzyl)imidazolidin-4(1H)-one moiety. The molecular formula is <math>C_{89}H_{130}BrN_{33}O_{15}Se</math>.</p>        | 2060.88455                             | 2060.87992                               |
| ARC-3126 |  <p>The structure of ARC-3126 is a complex molecule. It features a central peptide backbone consisting of seven amino acid residues: L-lysine, L-lysine, L-lysine, L-lysine, L-lysine, L-lysine, and L-lysine. The N-terminus of the peptide is modified with a 4-(dimethylamino)phenyl group. The C-terminus is linked to a 2-bromo-5-(4-bromo-5-(dimethylamino)benzyl)thiazolo[5,4-d]imidazole-3(1H)-one moiety. The molecular formula is <math>C_{58}H_{102}BrN_{31}O_9S</math>.</p> | 1487.7360                              | 1487.7348                                |

|                         |                                                                                                                                                              |                   |                   |
|-------------------------|--------------------------------------------------------------------------------------------------------------------------------------------------------------|-------------------|-------------------|
| <p>1<br/>(ARC-2067)</p> | 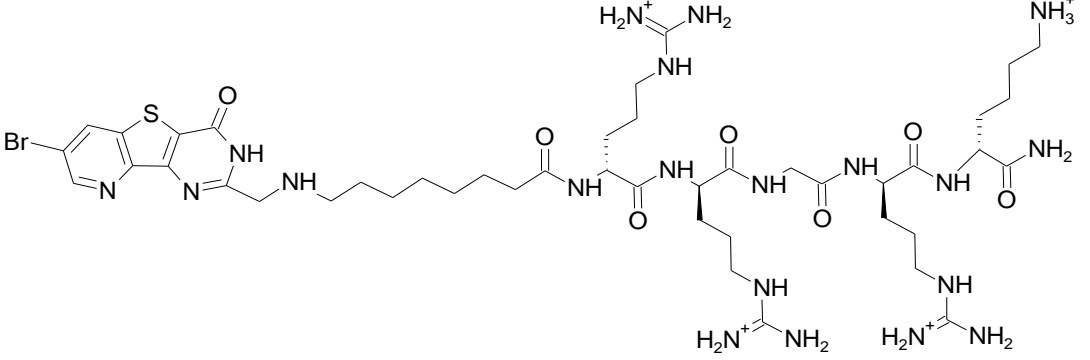 <p style="text-align: center;"><math>C_{44}H_{73}BrN_{20}O_7S</math></p>  | <p>1104.48594</p> | <p>1104.48579</p> |
| <p>2<br/>(ARC-2059)</p> |  <p style="text-align: center;"><math>C_{45}H_{74}BrN_{19}O_7S</math></p> | <p>1103.49069</p> | <p>1103.48934</p> |



|                         |                                                                                                                                                              |                   |                   |
|-------------------------|--------------------------------------------------------------------------------------------------------------------------------------------------------------|-------------------|-------------------|
| <p>3<br/>(ARC-2060)</p> | 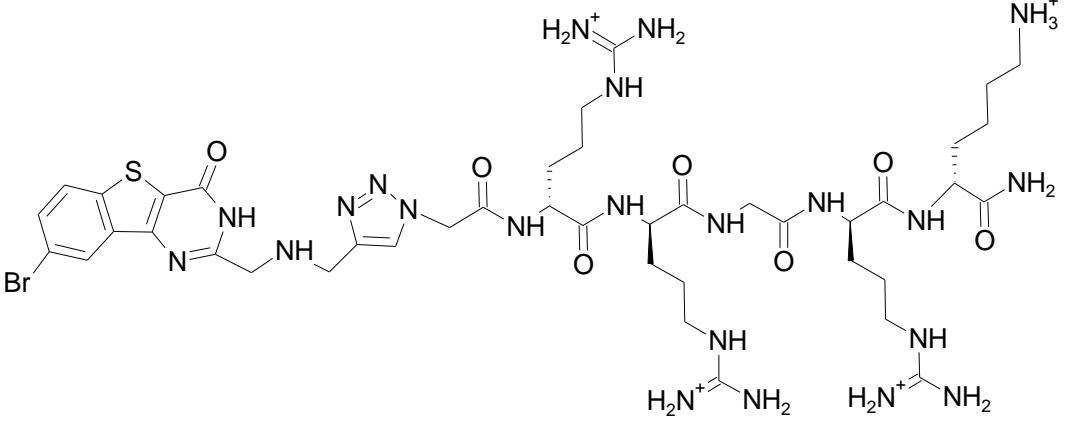 <p style="text-align: center;"><math>C_{42}H_{65}BrN_{22}O_7S</math></p>  | <p>1100.42949</p> | <p>1100.42622</p> |
| <p>4<br/>(ARC-2061)</p> |  <p style="text-align: center;"><math>C_{44}H_{68}BrN_{21}O_7S</math></p> | <p>1113.4497</p>  | <p>1113.4494</p>  |

|                         |                                                                                                                                                               |                   |                   |
|-------------------------|---------------------------------------------------------------------------------------------------------------------------------------------------------------|-------------------|-------------------|
| <p>5<br/>(ARC-2062)</p> | 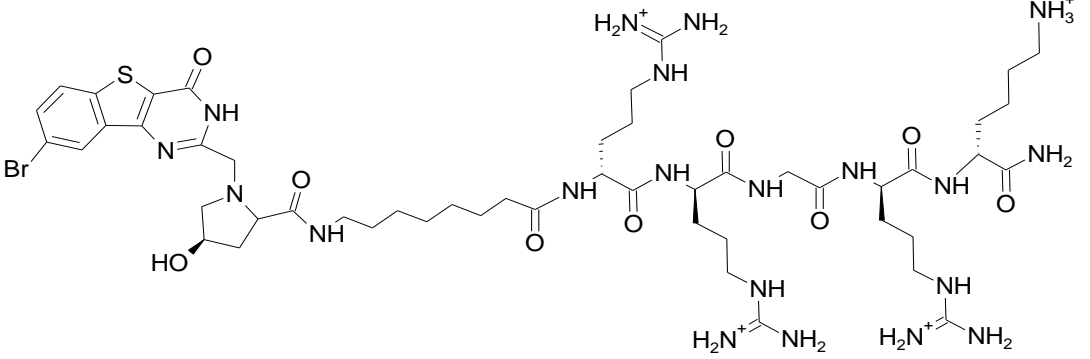 <p style="text-align: center;"><math>C_{50}H_{81}BrN_{20}O_9S</math></p>   | <p>1218.53634</p> | <p>1218.61533</p> |
| <p>6<br/>(ARC-2074)</p> |  <p style="text-align: center;"><math>C_{77}H_{111}BrN_{21}O_8S</math></p> | <p>1569.78856</p> | <p>1569.77928</p> |

|                         |                                                                                                                                                              |                   |                   |
|-------------------------|--------------------------------------------------------------------------------------------------------------------------------------------------------------|-------------------|-------------------|
| <p>7<br/>(ARC-2076)</p> | 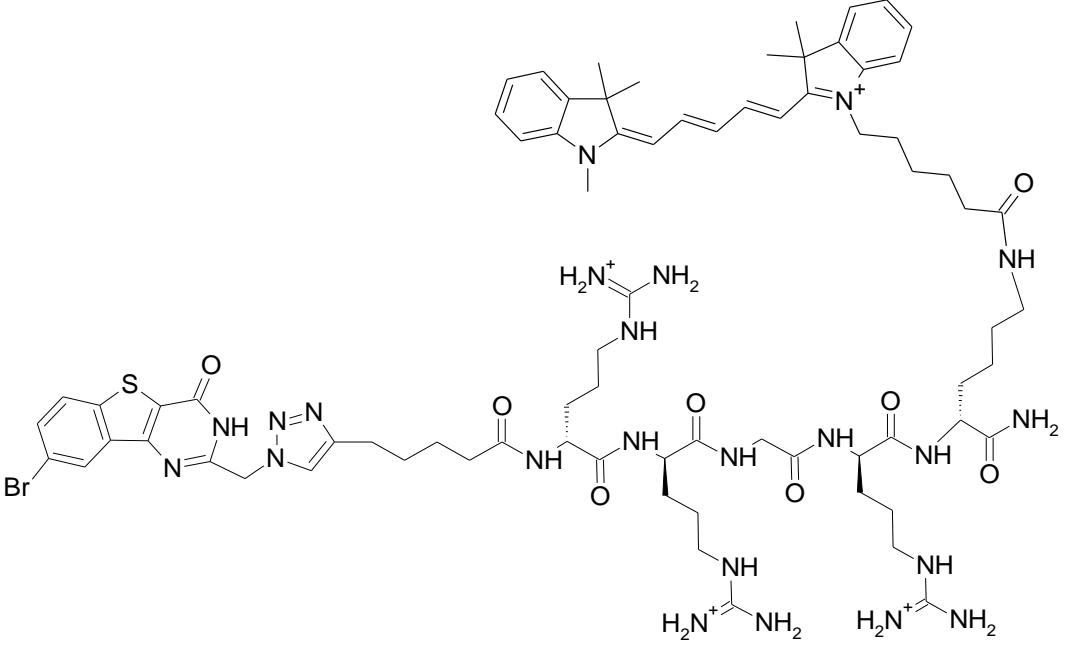 <p style="text-align: center;"><math>C_{76}H_{105}BrN_{23}O_8S</math></p> | <p>1579.74829</p> | <p>1579.73782</p> |
|-------------------------|--------------------------------------------------------------------------------------------------------------------------------------------------------------|-------------------|-------------------|

|                         |                                                                                                                                                                |                   |                   |
|-------------------------|----------------------------------------------------------------------------------------------------------------------------------------------------------------|-------------------|-------------------|
| <p>8<br/>(ARC-2065)</p> | 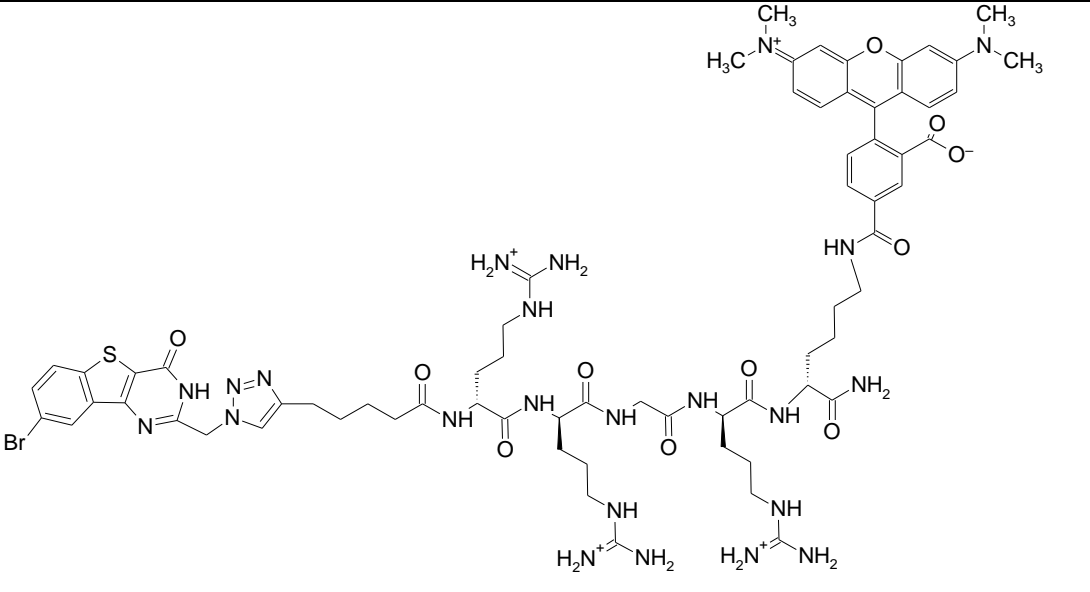 <p style="text-align: center;"><math>C_{69}H_{88}BrN_{23}O_{11}S</math></p> | <p>1526.59483</p> | <p>1526.59999</p> |
| <p>PIM peptide</p>      |  <p style="text-align: center;"><math>C_{26}H_{54}N_{16}O_5</math></p>      | <p>670.34668</p>  | <p>670.44580</p>  |

|                 |                                                                                                                                                                                                                                                                                                                                                                                                                                                                                                                                       |                   |                   |
|-----------------|---------------------------------------------------------------------------------------------------------------------------------------------------------------------------------------------------------------------------------------------------------------------------------------------------------------------------------------------------------------------------------------------------------------------------------------------------------------------------------------------------------------------------------------|-------------------|-------------------|
| <p>ARC-2073</p> | 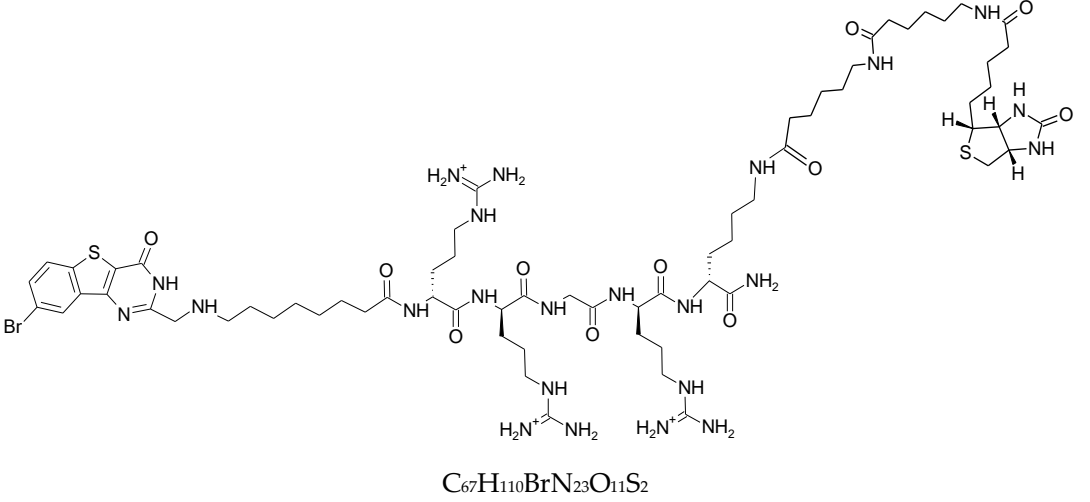 <p>The structure of ARC-2073 features a 5-bromo-2-thioxanthone core. A methylene group at the 2-position is linked to a long chain of amide bonds. This chain includes three guanidinium groups (H<sub>2</sub>N<sup>+</sup>=NH<sub>2</sub>) and a terminal 1,2,4-triazole ring system.</p> <p><math>C_{67}H_{110}BrN_{23}O_{11}S_2</math></p>                                                                                                      | <p>1555.73208</p> | <p>1555.73643</p> |
| <p>ARC-2090</p> |  <p>The structure of ARC-2090 features a 5-bromo-2-thioxanthone core. A methylene group at the 2-position is linked to a chain containing a hydroxyl group, a long amide chain, and three guanidinium groups. The chain terminates in a long alkyl chain connected to a positively charged nitrogen atom (N<sup>+</sup>), which is further substituted with a phenyl ring and a methyl group.</p> <p><math>C_{96}H_{147}BrN_{33}O_{12}S</math></p> | <p>2066.0818</p>  | <p>2066.0805</p>  |

Table S3. Selectivity profiling of ARC inhibitors (1  $\mu$ M) towards a panel of PKs

| PK             | Residual activity, % |              |              |              |              |
|----------------|----------------------|--------------|--------------|--------------|--------------|
|                | ARC-3125             | ARC-3126     | Cpd 1        | Cpd 2        | Cpd 3        |
| ABL            | 106 $\pm$ 0          | 116 $\pm$ 5  | 94 $\pm$ 8   | 89 $\pm$ 5   | 91 $\pm$ 12  |
| AMPK           | 6 $\pm$ 0            | 38 $\pm$ 4   | 92 $\pm$ 9   | 91 $\pm$ 4   | 47 $\pm$ 6   |
| ASK1           | 93 $\pm$ 0           | 121 $\pm$ 11 | 99 $\pm$ 0   | 102 $\pm$ 5  | 101 $\pm$ 2  |
| Aurora A       | 84 $\pm$ 1           | 132 $\pm$ 8  | 99 $\pm$ 6   | 106 $\pm$ 3  | 97 $\pm$ 3   |
| Aurora B       | 100 $\pm$ 4          | 114 $\pm$ 20 | 102 $\pm$ 19 | 98 $\pm$ 2   | 111 $\pm$ 1  |
| BRK            | 82 $\pm$ 41          | 81 $\pm$ 4   | 126 $\pm$ 8  | 114 $\pm$ 11 | 114 $\pm$ 13 |
| BRSK1          | 84 $\pm$ 2           | 50 $\pm$ 10  | 107 $\pm$ 5  | 101 $\pm$ 0  | 90 $\pm$ 11  |
| BRSK2          | 107 $\pm$ 23         | 100 $\pm$ 9  | 124 $\pm$ 12 | 108 $\pm$ 12 | 96 $\pm$ 8   |
| BTK            | 31 $\pm$ 2           | 43 $\pm$ 2   | 106 $\pm$ 10 | 99 $\pm$ 20  | 82 $\pm$ 1   |
| CAMK1          | 3 $\pm$ 11           | 55 $\pm$ 9   | 81 $\pm$ 18  | 81 $\pm$ 6   | 49 $\pm$ 11  |
| CAMKKb         | 47 $\pm$ 1           | 104 $\pm$ 13 | 117 $\pm$ 1  | 108 $\pm$ 1  | 85 $\pm$ 4   |
| CDK2-Cyclin A  | 17 $\pm$ 1           | 106 $\pm$ 5  | 106 $\pm$ 12 | 105 $\pm$ 9  | 100 $\pm$ 0  |
| CDK9-Cyclin T1 | 55 $\pm$ 1           | 104 $\pm$ 3  | 110 $\pm$ 10 | 101 $\pm$ 20 | 90 $\pm$ 18  |
| CHK1           | 76 $\pm$ 1           | 100 $\pm$ 6  | 122 $\pm$ 17 | 112 $\pm$ 6  | 104 $\pm$ 2  |
| CHK2           | 116 $\pm$ 16         | 76 $\pm$ 15  | 107 $\pm$ 9  | 103 $\pm$ 2  | 52 $\pm$ 10  |
| CK1 $\gamma$ 2 | 45 $\pm$ 5           | 66 $\pm$ 10  | 117 $\pm$ 3  | 116 $\pm$ 10 | 88 $\pm$ 1   |
| CK1 $\delta$   | 71 $\pm$ 4           | 99 $\pm$ 1   | 104 $\pm$ 4  | 99 $\pm$ 3   | 88 $\pm$ 12  |
| CK2            | 30 $\pm$ 2           | 8 $\pm$ 3    | 77 $\pm$ 9   | 63 $\pm$ 12  | 57 $\pm$ 7   |
| CLK2           | -1 $\pm$ 5           | 57 $\pm$ 15  | 97 $\pm$ 9   | 24 $\pm$ 2   | 30 $\pm$ 1   |
| CSK            | 85 $\pm$ 2           | 91 $\pm$ 18  | 141 $\pm$ 10 | 112 $\pm$ 20 | 116 $\pm$ 5  |
| DAPK1          | 18 $\pm$ 1           | 49 $\pm$ 18  | 85 $\pm$ 3   | 60 $\pm$ 11  | 88 $\pm$ 3   |
| DDR2           | 84 $\pm$ 13          | 93 $\pm$ 3   | 104 $\pm$ 22 | 107 $\pm$ 7  | 112 $\pm$ 6  |
| DYRK1A         | 28 $\pm$ 7           | 99 $\pm$ 6   | 74 $\pm$ 4   | 5 $\pm$ 2    | 37 $\pm$ 15  |
| DYRK2          | 54 $\pm$ 6           | 88 $\pm$ 6   | 85 $\pm$ 17  | 64 $\pm$ 5   | 83 $\pm$ 22  |
| DYRK3          | 22 $\pm$ 2           | 82 $\pm$ 1   | 43 $\pm$ 6   | 34 $\pm$ 2   | 55 $\pm$ 4   |
| EF2K           | 103 $\pm$ 1          | 85 $\pm$ 10  | 104 $\pm$ 2  | 98 $\pm$ 7   | 102 $\pm$ 3  |
| EIF2AK3        | 11 $\pm$ 11          | 60 $\pm$ 6   | 94 $\pm$ 7   | 98 $\pm$ 5   | 113 $\pm$ 13 |
| EPH-A2         | 108 $\pm$ 2          | 113 $\pm$ 13 | 116 $\pm$ 5  | 113 $\pm$ 10 | 132 $\pm$ 6  |
| EPH-A4         | 97 $\pm$ 4           | 107 $\pm$ 13 | 97 $\pm$ 2   | 103 $\pm$ 16 | 95 $\pm$ 5   |
| EPH-B1         | 106 $\pm$ 12         | 96 $\pm$ 6   | 103 $\pm$ 9  | 99 $\pm$ 15  | 106 $\pm$ 11 |

|           |        |        |        |        |        |
|-----------|--------|--------|--------|--------|--------|
| EPH-B2    | 102±8  | 107±4  | 95±16  | 100±5  | 96±14  |
| EPH-B3    | 104±3  | 94±10  | 107±26 | 106±2  | 79±3   |
| EPH-B4    | 119±7  | 101±10 | 104±2  | 118±11 | 98±13  |
| ERK1      | 89±7   | 84±7   | 119±16 | 125±6  | 107±6  |
| ERK2      | 161±4  | 166±1  | 101±14 | 102±1  | 104±5  |
| ERK5      | 47±1   | 92±1   | 111±9  | 77±5   | 93±4   |
| ERK8      | 18±9   | 49±30  | 109±8  | 78±17  | 83±2   |
| FGF-R1    | 100±19 | 102±3  | 142±8  | 126±10 | 110±2  |
| GCK       | 56±4   | 88±14  | 112±0  | 114±2  | 97±7   |
| GSK3β     | 140±13 | 80±0   | 110±12 | 75±8   | 64±8   |
| HER4      | 120±9  | 110±5  | 111±13 | 114±15 | 105±8  |
| HIPK1     | 61±1   | 95±15  | 111±9  | 60±12  | 60±3   |
| HIPK2     | 16±2   | 75±15  | 103±13 | 48±2   | 50±7   |
| HIPK3     | 21±0   | 93±2   | 116±15 | 72±12  | 57±7   |
| IGF-1R    | 4±0    | 114±24 | 77±8   | 91±6   | 58±7   |
| IKKβ      | 80±1   | 104±2  | 97±0   | 100±11 | 90±6   |
| IKKε      | 77±4   | 118±12 | 116±9  | 104±15 | 122±12 |
| IR        | 22±6   | 117±6  | 122±7  | 139±35 | 113±23 |
| IRAK1     | 16±3   | 120±2  | 131±17 | 134±21 | 113±11 |
| IRAK4     | 73±2   | 97±2   | 110±3  | 108±8  | 107±7  |
| IRR       | 20±34  | 75±4   | 99±2   | 99±5   | 110±1  |
| JAK2      | 115±5  | 116±9  | 93±14  | 82±16  | 72±21  |
| JNK1      | 82±13  | 116±4  | 100±13 | 112±2  | 115±13 |
| JNK2      | 123±7  | 38±13  | 107±1  | 91±7   | 129±21 |
| JNK3      | 120±2  | 121±5  | 92±0   | 108±3  | 113±22 |
| Lck       | 226±7  | 132±28 | 94±18  | 103±18 | 78±6   |
| LKB1      | 49±28  | 114±11 | 107±1  | 118±4  | 115±13 |
| MAP4K3    | 17±1   | 81±7   | 119±1  | 118±3  | 105±2  |
| MAP4K5    | 102±3  | 50±12  | 107±12 | 112±10 | 98±3   |
| MAPKAP-K2 | 51±5   | 100±3  | 107±10 | 107±2  | 114±4  |
| MAPKAP-K3 | 48±1   | 43±7   | 111±6  | 110±11 | 85±5   |
| MARK1     | 76±4   | 94±0   | 110±15 | 113±1  | 106±2  |
| MARK2     | 86±4   | 103±7  | 106±10 | 107±4  | 79±0   |

|                   |          |          |          |          |          |
|-------------------|----------|----------|----------|----------|----------|
| MARK3             | 72 ± 1   | 112 ± 17 | 100 ± 6  | 102 ± 7  | 100 ± 8  |
| MARK4             | 92 ± 3   | 119 ± 7  | 124 ± 14 | 128 ± 3  | 90 ± 12  |
| MEKK1             | 77 ± 1   | 103 ± 2  | 108 ± 16 | 119 ± 5  | 98 ± 2   |
| MELK              | 34 ± 4   | 79 ± 1   | 86 ± 5   | 75 ± 9   | 73 ± 11  |
| MINK1             | 86 ± 1   | 104 ± 16 | 129 ± 2  | 106 ± 13 | 133 ± 14 |
| MKK1              | 32 ± 27  | 100 ± 6  | 93 ± 4   | 94 ± 1   | 92 ± 6   |
| MKK2              | 68 ± 5   | 117 ± 14 | 102 ± 5  | 108 ± 11 | 96 ± 7   |
| MKK6              | 110 ± 10 | 105 ± 1  | 122 ± 2  | 121 ± 3  | 126 ± 10 |
| MLK1              | 100 ± 8  | 122 ± 21 | 112 ± 13 | 98 ± 8   | 101 ± 9  |
| MLK3              | 98 ± 2   | 117 ± 10 | 105 ± 5  | 107 ± 1  | 94 ± 2   |
| MNK1              | 67 ± 4   | 89 ± 5   | 102 ± 3  | 66 ± 7   | 89 ± 8   |
| MNK2              | 19 ± 4   | 84 ± 17  | 80 ± 3   | 47 ± 2   | 96 ± 10  |
| MPSK1             | 75 ± 3   | 79 ± 11  | 113 ± 21 | 113 ± 15 | 110 ± 2  |
| MSK1              | 6 ± 8    | 29 ± 1   | 106 ± 13 | 53 ± 4   | 90 ± 2   |
| MST2              | 73 ± 1   | 106 ± 6  | 115 ± 11 | 128 ± 35 | 84 ± 6   |
| MST3              | 51 ± 24  | 102 ± 5  | 104 ± 3  | 112 ± 8  | 98 ± 1   |
| MST4              | 71 ± 4   | 125 ± 22 | 143 ± 10 | 121 ± 8  | 95 ± 32  |
| NEK2 $\alpha$     | 21 ± 3   | 91 ± 2   | 108 ± 5  | 119 ± 12 | 92 ± 1   |
| NEK6              | 97 ± 0   | 85 ± 17  | 107 ± 11 | 126 ± 5  | 117 ± 23 |
| NUAK1             | 7 ± 15   | 47 ± 7   | 95 ± 14  | 102 ± 14 | 74 ± 6   |
| OSR1              | 73 ± 2   | 116 ± 12 | 114 ± 7  | 114 ± 4  | 107 ± 14 |
| p38 $\alpha$ MAPK | 53 ± 8   | 116 ± 4  | 113 ± 10 | 116 ± 10 | 110 ± 7  |
| p38 $\beta$ MAPK  | 80 ± 6   | 94 ± 4   | 108 ± 14 | 113 ± 4  | 100 ± 6  |
| p38 $\delta$ MAPK | 70 ± 6   | 111 ± 4  | 109 ± 7  | 117 ± 1  | 108 ± 8  |
| p38 $\gamma$ MAPK | 119 ± 11 | 129 ± 10 | 116 ± 6  | 115 ± 0  | 111 ± 1  |
| PAK2              | 29 ± 4   | 72 ± 5   | 99 ± 9   | 100 ± 10 | 91 ± 4   |
| PAK4              | 50 ± 2   | 71 ± 42  | 91 ± 0   | 98 ± 14  | 77 ± 13  |
| PAK5              | 25 ± 6   | 89 ± 2   | 112 ± 3  | 100 ± 2  | 92 ± 5   |
| PAK6              | 34 ± 11  | 103 ± 5  | 119 ± 8  | 110 ± 15 | 86 ± 8   |
| PDGFRA            | 97 ± 0   | 116 ± 3  | 115 ± 2  | 101 ± 16 | 108 ± 4  |
| PDK1              | 123 ± 7  | 111 ± 13 | 116 ± 3  | 121 ± 7  | 118 ± 16 |
| PHK               | 104 ± 11 | 128 ± 10 | 109 ± 3  | 98 ± 4   | 78 ± 6   |
| PIM1              | 0 ± 0    | 0 ± 0    | 9 ± 1    | 5 ± 3    | 5 ± 1    |



|              |          |          |          |          |          |
|--------------|----------|----------|----------|----------|----------|
| PIM2         | 0 ± 1    | 10 ± 11  | 72 ± 3   | 7 ± 1    | 15 ± 1   |
| PIM3         | 7 ± 1    | 13 ± 3   | 17 ± 1   | 4 ± 1    | 6 ± 0    |
| PINK         | ---      | ---      | 116 ± 5  | 121 ± 17 | 92 ± 0   |
| PKA          | 7 ± 3    | 97 ± 0   | 100 ± 9  | 85 ± 6   | 82 ± 10  |
| PKB $\alpha$ | -1 ± 1   | 80 ± 4   | 101 ± 6  | 67 ± 7   | 72 ± 12  |
| PKB $\beta$  | 1 ± 1    | 86 ± 10  | 115 ± 26 | 101 ± 5  | 54 ± 6   |
| PKC $\alpha$ | 81 ± 9   | 115 ± 17 | 112 ± 2  | 102 ± 4  | 110 ± 5  |
| PKC $\zeta$  | 14 ± 1   | 92 ± 4   | 95 ± 6   | 118 ± 11 | 89 ± 2   |
| PKC $\gamma$ | 86 ± 9   | 98 ± 8   | 99 ± 11  | 97 ± 3   | 105 ± 9  |
| PKD1         | 18 ± 4   | 111 ± 10 | 128 ± 13 | 134 ± 14 | 82 ± 3   |
| PLK1         | 40 ± 4   | 50 ± 16  | 99 ± 1   | 99 ± 1   | 97 ± 7   |
| PRAK         | 112 ± 3  | 97 ± 7   | 104 ± 13 | 89 ± 0   | 79 ± 7   |
| PRK2         | 16 ± 6   | 58 ± 15  | 92 ± 2   | 94 ± 12  | 67 ± 4   |
| RIPK2        | 37 ± 6   | 99 ± 6   | 62 ± 7   | 72 ± 0   | 71 ± 8   |
| ROCK 2       | 5 ± 1    | 65 ± 17  | 114 ± 17 | 61 ± 5   | 62 ± 5   |
| RSK1         | 19 ± 1   | 82 ± 10  | 95 ± 6   | 31 ± 4   | 74 ± 12  |
| RSK2         | 17 ± 1   | 86 ± 15  | 109 ± 11 | 92 ± 10  | 106 ± 11 |
| S6K1         | 13 ± 0   | 75 ± 2   | 98 ± 2   | 85 ± 1   | 55 ± 6   |
| SGK1         | 9 ± 5    | 75 ± 9   | 110 ± 19 | 89 ± 3   | 95 ± 4   |
| SIK2         | 34 ± 4   | 109 ± 6  | 110 ± 5  | 107 ± 10 | 68 ± 3   |
| SIK3         | 89 ± 7   | 117 ± 15 | 106 ± 2  | 97 ± 9   | 66 ± 6   |
| SmMLCK       | 66 ± 1   | 116 ± 39 | 98 ± 5   | 98 ± 9   | 94 ± 0   |
| Src          | 153 ± 22 | 103 ± 2  | 97 ± 3   | 110 ± 12 | 119 ± 1  |
| SRPK1        | 54 ± 1   | 89 ± 5   | 102 ± 1  | 113 ± 7  | 91 ± 2   |
| STK33        | 84 ± 20  | 107 ± 6  | 110 ± 2  | 106 ± 3  | 91 ± 0   |
| SYK          | 94 ± 10  | 75 ± 20  | 133 ± 15 | 123 ± 3  | 114 ± 2  |
| TAK1         | 9 ± 4    | 88 ± 17  | 107 ± 3  | 101 ± 1  | 99 ± 10  |
| TAO1         | 32 ± 6   | 95 ± 3   | 106 ± 10 | 49 ± 0   | 80 ± 4   |
| TBK1         | 68 ± 3   | 105 ± 12 | 113 ± 29 | 113 ± 10 | 46 ± 4   |
| TESK1        | 102 ± 3  | 99 ± 14  | 111 ± 11 | 106 ± 13 | 105 ± 1  |
| TGFBR1       | 108 ± 18 | 109 ± 2  | 103 ± 8  | 106 ± 7  | 95 ± 10  |
| TIE2         | 104 ± 9  | 106 ± 0  | 110 ± 6  | 109 ± 9  | 103 ± 12 |
| TLK1         | 78 ± 1   | 91 ± 10  | 118 ± 1  | 122 ± 9  | 109 ± 10 |

|        |          |          |          |          |          |
|--------|----------|----------|----------|----------|----------|
| TrkA   | 97 ± 7   | 112 ± 21 | 106 ± 17 | 128 ± 13 | 95 ± 2   |
| TSSK1  | 63 ± 6   | 97 ± 16  | 98 ± 9   | 108 ± 0  | 100 ± 10 |
| TTBK1  | 123 ± 25 | 103 ± 4  | 116 ± 5  | 97 ± 7   | 99 ± 6   |
| TTBK2  | 101 ± 24 | 77 ± 2   | 109 ± 6  | 125 ± 12 | 105 ± 15 |
| TTK    | 45 ± 1   | 110 ± 4  | 113 ± 0  | 94 ± 15  | 86 ± 9   |
| ULK1   | 89 ± 9   | 119 ± 6  | 107 ± 5  | 99 ± 6   | 108 ± 11 |
| ULK2   | 34 ± 3   | 104 ± 9  | 115 ± 5  | 127 ± 9  | 104 ± 11 |
| VEG-FR | 95 ± 41  | 85 ± 0   | 110 ± 9  | 96 ± 3   | 90 ± 5   |
| WNK1   | 105 ± 33 | 107 ± 34 | 96 ± 4   | 93 ± 1   | 104 ± 6  |
| YES1   | 104 ± 8  | 98 ± 12  | 110 ± 0  | 104 ± 12 | 124 ± 1  |
| ZAP70  | 105 ± 8  | 83 ± 30  | 95 ± 21  | 87 ± 7   | 53 ± 14  |

Mean values ± standard error are shown (N = 2).

Table S4. HPLC (C18 reversed phase) purity data for the previously unpublished compounds

| Compound    |          | Molecular formula                                                                 | HPLC data         |                     |            |                      |
|-------------|----------|-----------------------------------------------------------------------------------|-------------------|---------------------|------------|----------------------|
| #           | Code     |                                                                                   | Gradient          | t <sub>R</sub> /min | Purity (%) | λ <sub>max</sub> /nm |
| -           | ARC-1451 | C <sub>89</sub> H <sub>130</sub> BrN <sub>33</sub> O <sub>15</sub> Se             | 18 ... 42/9.5 min | 3.73                | 100        | 560                  |
| -           | ARC-3126 | C <sub>58</sub> H <sub>102</sub> BrN <sub>31</sub> O <sub>9</sub> S               | 5 ... 40/7 min    | 3.61                | 98.3       | 307                  |
| 1           | ARC-2067 | C <sub>44</sub> H <sub>73</sub> BrN <sub>20</sub> O <sub>7</sub> S                | 20 ... 95/11 min  | 7.33                | 96.1       | 307                  |
| 2           | ARC-2059 | C <sub>45</sub> H <sub>74</sub> BrN <sub>19</sub> O <sub>7</sub> S                | 20 ... 95/11 min  | 8.63                | 97.2       | 342                  |
| 3           | ARC-2060 | C <sub>42</sub> H <sub>65</sub> BrN <sub>22</sub> O <sub>7</sub> S                | 15 ... 95/7 min   | 7.67                | 97.5       | 342                  |
| 4           | ARC-2061 | C <sub>44</sub> H <sub>68</sub> BrN <sub>21</sub> O <sub>7</sub> S                | 5 ... 40/7 min    | 3.62                | 96.1       | 342                  |
| 5           | ARC-2062 | C <sub>50</sub> H <sub>81</sub> BrN <sub>20</sub> O <sub>9</sub> S                | 5 ... 40/7 min    | 3.75                | 97.3       | 342                  |
| 6           | ARC-2074 | C <sub>77</sub> H <sub>111</sub> BrN <sub>21</sub> O <sub>8</sub> S               | 50 ... 95/7 min   | 6.19                | 97.4       | 650                  |
| 7           | ARC-2076 | C <sub>76</sub> H <sub>105</sub> BrN <sub>23</sub> O <sub>8</sub> S               | 50 ... 95/7 min   | 6.46                | 98.4       | 650                  |
| 8           | ARC-2065 | C <sub>69</sub> H <sub>88</sub> BrN <sub>23</sub> O <sub>11</sub> S               | 74 ... 82/7 min   | 5.20                | 96         | 560                  |
| PIM peptide |          | C <sub>26</sub> H <sub>54</sub> N <sub>16</sub> O <sub>5</sub>                    | 5 ... 25/8 min    | 3.61                | 96         | 206                  |
| ARC-2090    |          | C <sub>96</sub> H <sub>147</sub> BrN <sub>33</sub> O <sub>12</sub> S              | 25 ... 95/7 min   | 3.38                | 95         | 650                  |
| ARC-2073    |          | C <sub>67</sub> H <sub>110</sub> BrN <sub>23</sub> O <sub>11</sub> S <sub>2</sub> | 50 ... 95/7 min   | 3.54                | 96.7       | 342                  |

Separation was achieved with a Luna C18 5 μm column (250×4.6 mm Phenomenex) protected by a 5 μm Luna C18 4×2.0 mm guard column. Mobile phase A: 0.1% TFA in water, mobile phase B: 0.1% TFA in ACN and a flow of 1 mL/min were applied. The speed of the gradient is specified in the table.

## Supplementary Figures

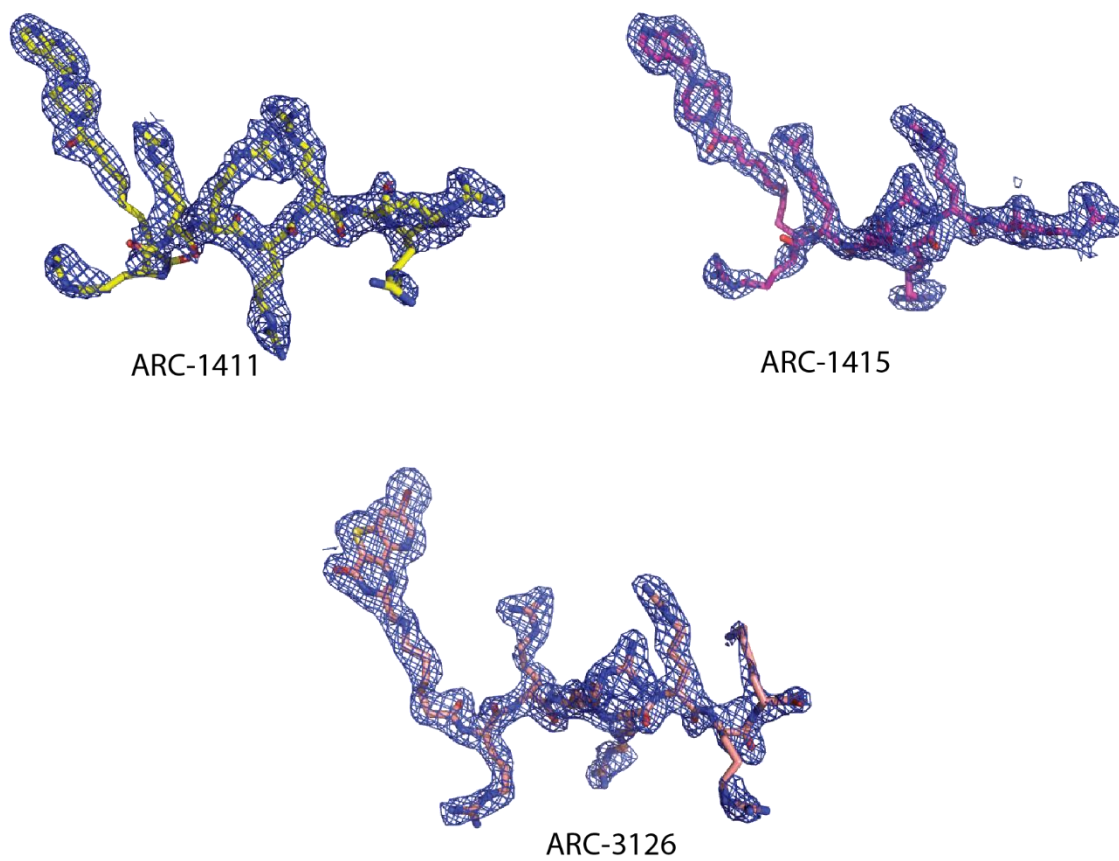

Figure S1.  $2F_o - F_c$  electron density maps contoured at  $1\sigma$  for the inhibitors in co-crystal structures with PIM-1. Inhibitors are shown in stick representation.

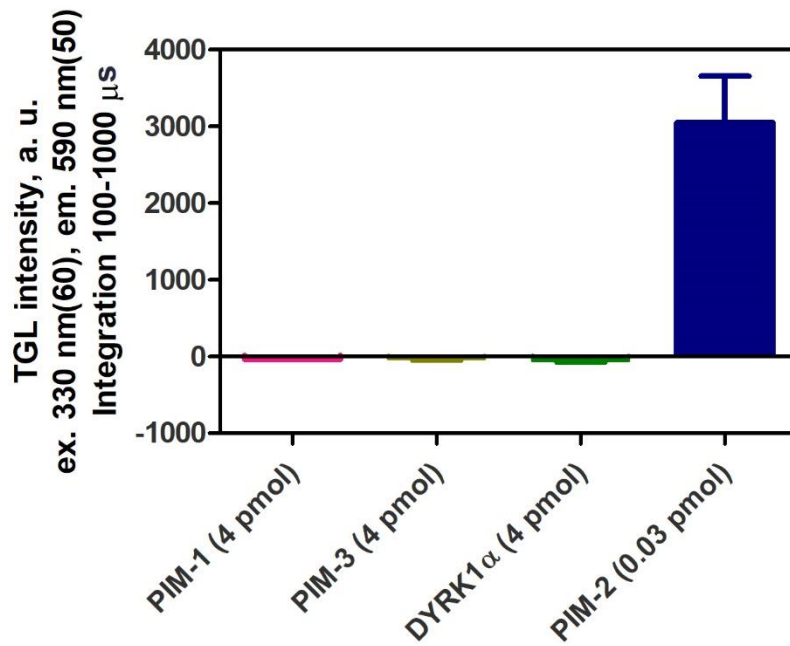

Figure S2. Specificity of D1D2 antibody to PIM-2 detection.

ARC-2073 (4 pmol) was immobilized onto STRA-coated surface, incubated with the kinases, and detected with D1D2 (84 fmol) and G0506 (110 fmol). Mean values  $\pm$  SEM are shown (N = 2). Of four protein kinases tested, only complex with PIM-2 yielded time-resolved signal reflecting binding of the detection reagent D1D2-G0506 to PIM-2.

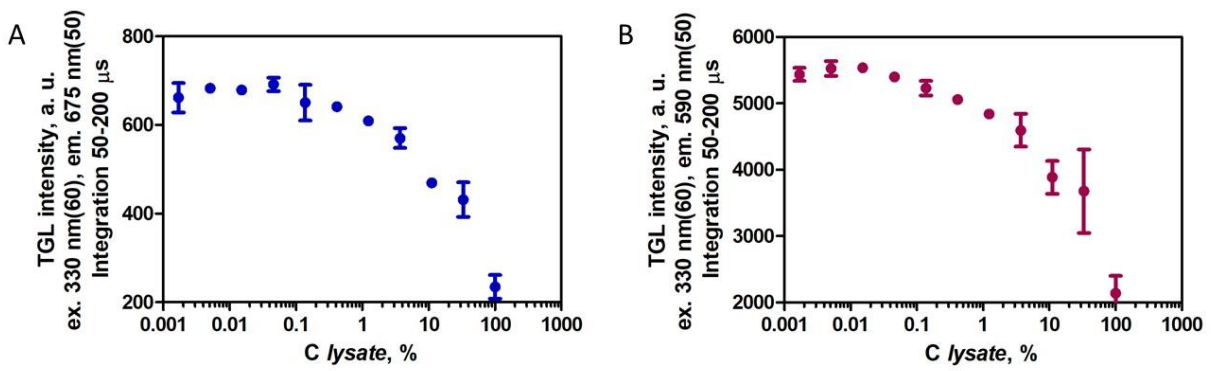

Figure S3. Stability of ARC-1451/PIM-2 complex in PC-3 cell lysate.

The stability of complex in a biological matrix was assessed in solution by FRET measurement from ARC-1451 (6 nM) to D1D2-AF647 (10 nM) in the presence of PIM-2 (10 nM). (A) Signal from FRET acceptor D1D2-AF647; (B) signal from FRET donor ARC-1451/PIM-2. Mean values  $\pm$  SEM are shown (N = 2). The presence of increased percentage of lysate results in decline of both donor and acceptor signal intensities due to the matrix effects.

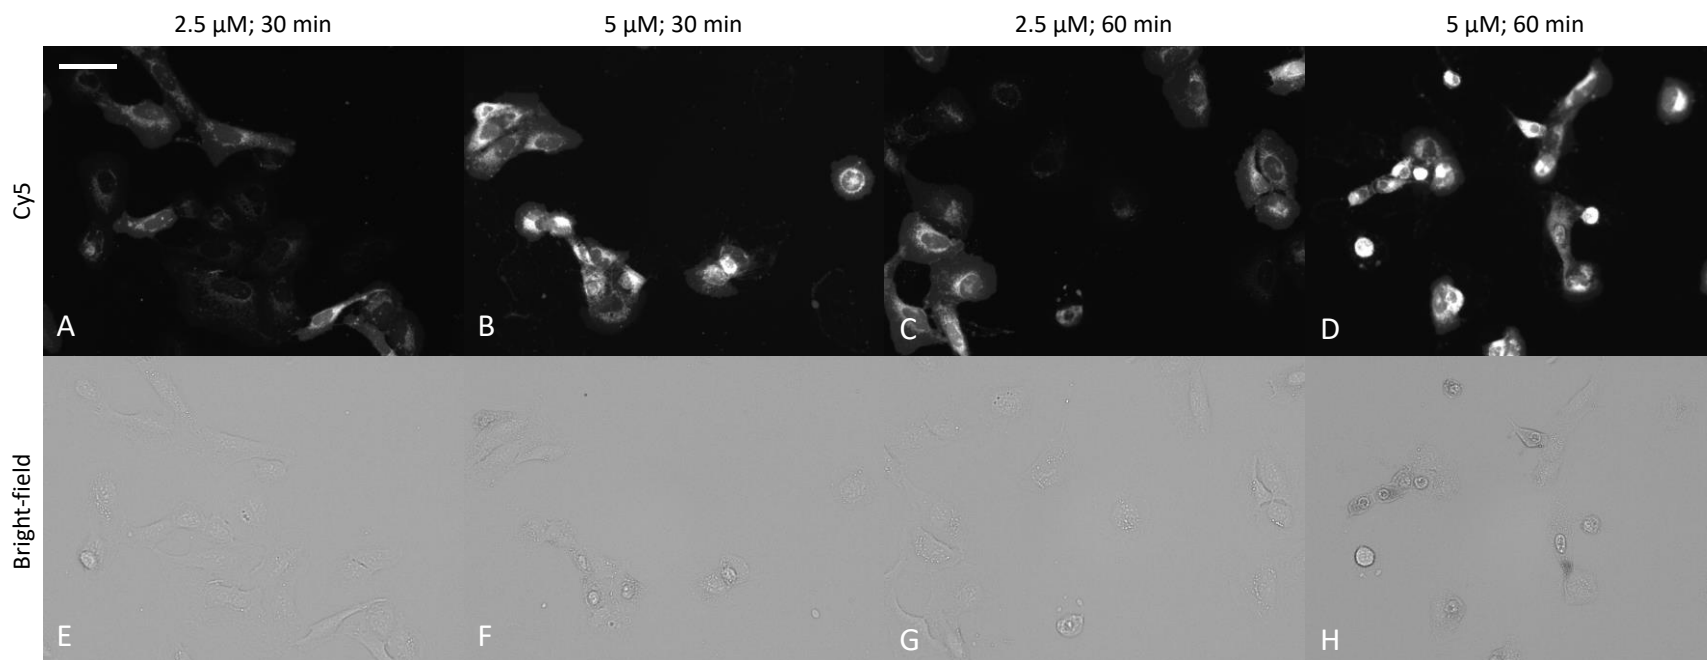

Figure S4. Time- and concentration-dependence of the cellular uptake of compound **6** into live U2OS cells.

(A-D) Cy5 channel; (E-H) bright-field. Incubation conditions are listed above the images. Representative images from a single experiment are shown; in all wells, imaging settings were identical (see Materials and Methods section of the main text). Scale bar: 50  $\mu\text{m}$ . The signal intensity in the fluorescence channel reflects efficient internalization of the probe following incubation with 2.5  $\mu\text{M}$  or higher concentration in the incubation medium. Following 60 min incubation with 5  $\mu\text{M}$  concentration of probe, darker regions are observable in bright-field images resulting from accumulation of the probe in cells which causes absorption of visible light by the Cy5 dye.

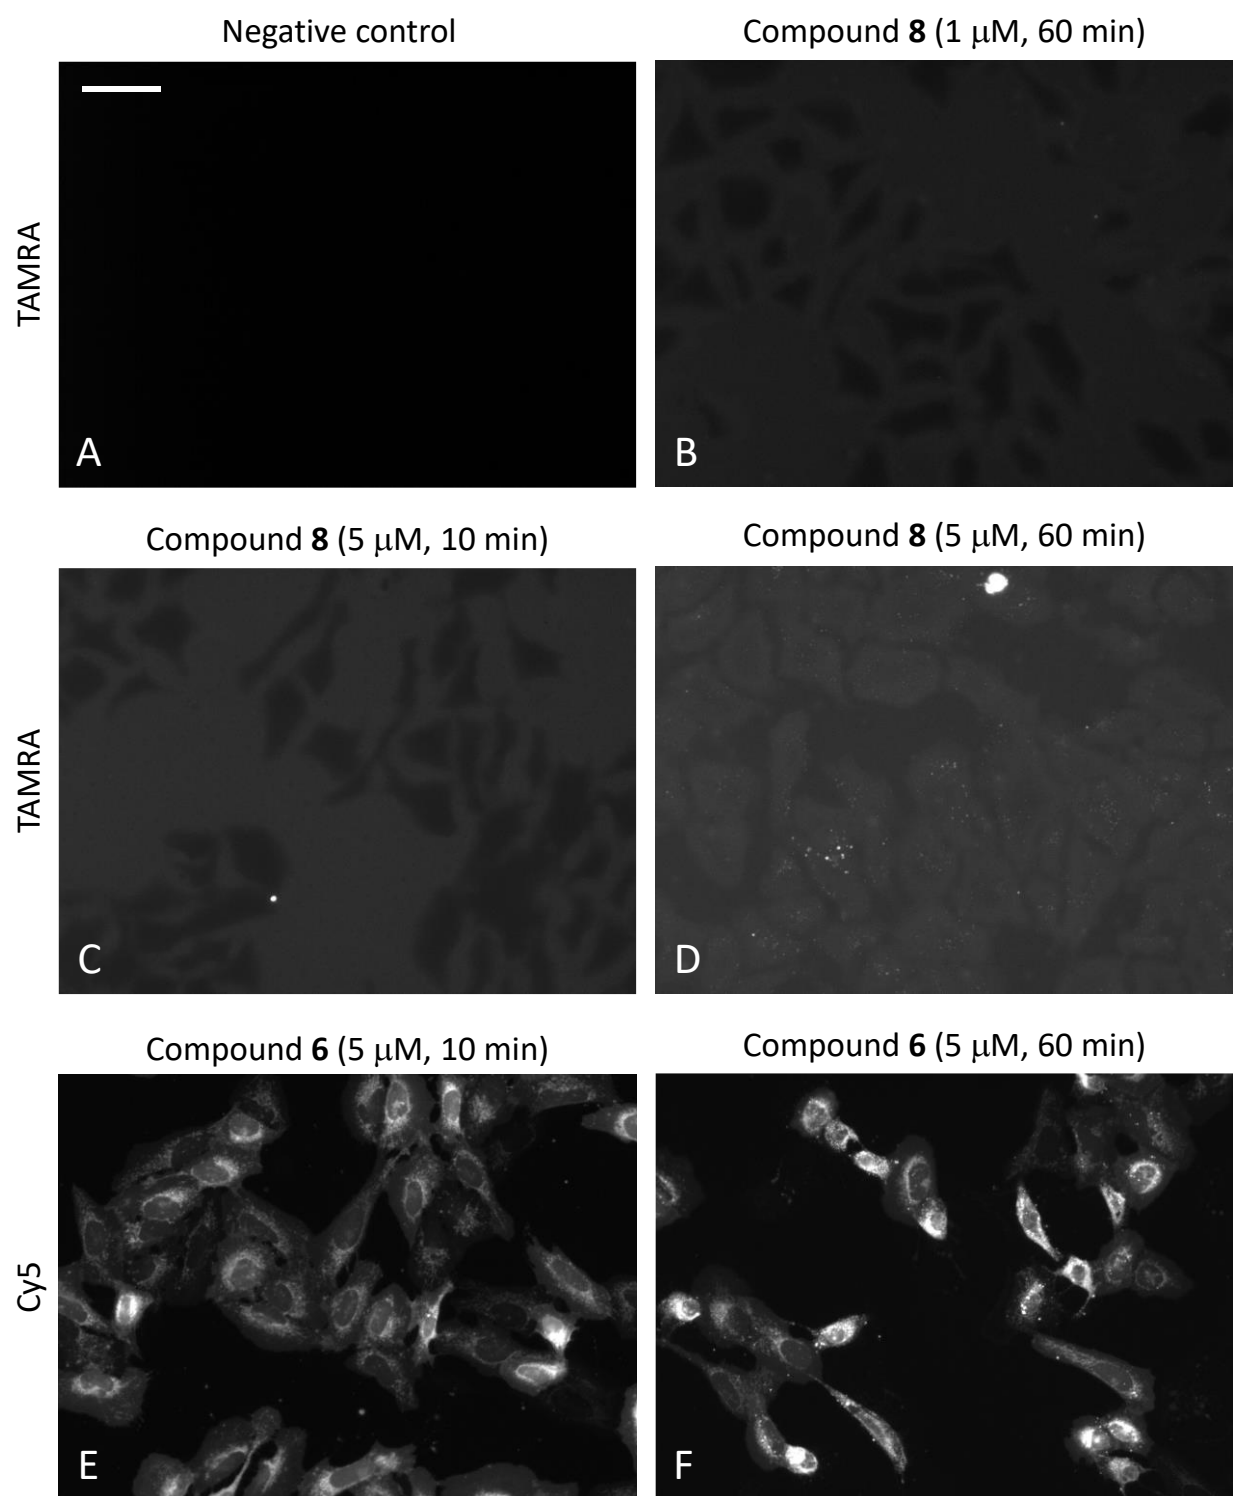

Figure S5. Comparison of cellular uptake of compound 8 (labelled with TAMRA) and compound 6 (labelled with Cy5) into live U2OS cells.



(A) TAMRA signal intensity in the well not treated with ARC probes; (B-D) TAMRA signal intensity in wells incubated with compound **8**; (E-F) Cy5 signal intensity in wells incubated with compound **6**. Incubation conditions are listed above the images. Scale bar: 50  $\mu\text{m}$ . Representative images from a single experiment are shown; for TAMRA channel, more intense imaging settings (LED intensity, integration time, detector gain) were used than for Cy5 channel (see Materials and Methods section of the main text). Very low intracellular signal can be seen for compound **8** (following incubation with 5  $\mu\text{M}$  probe for 60 min), whereas incubation with lower concentration of the probe or shortening of incubation time results in cellular exclusion of the compound. The nature of the fluorescent dye thus impacts the cellular internalization and non-specific binding properties of the conjugate.

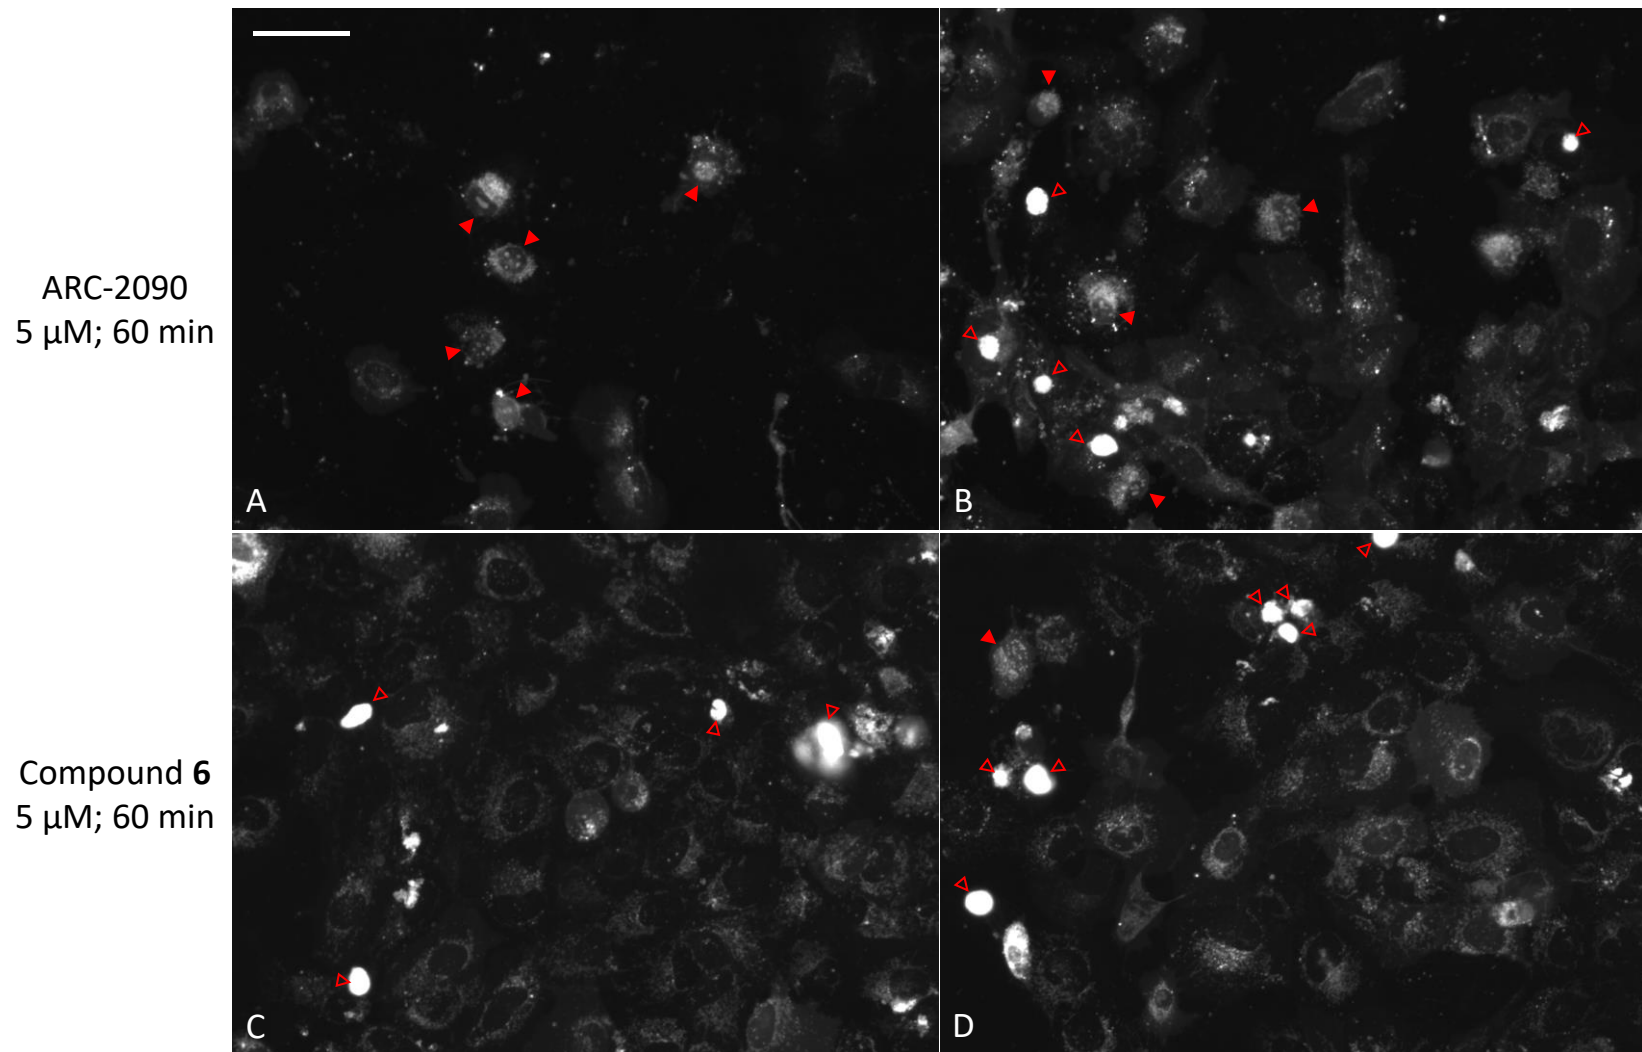

Figure S6. Intracellular localization of compounds labelled with Cy5 and incorporating different number of Arg residues.

Imaging was carried out in live U2OS cells; (A, B) ARC-2090 (6 Arg); (C, D) compound 6 (3 Arg). Incubation conditions are listed on the left; representative images from a single experiment are shown (replicate images for the same treatment condition represent identically treated wells).

Scale bar: 50  $\mu\text{m}$ . Red filled triangles point to the cells featuring strong staining in the nuclear compartment; red empty triangles indicate dead cells. In case of ARC-2090, higher proportion of cells with intense staining of nucleoli is evident, which can be attributed to the incorporation of of (D-Arg)<sub>6</sub>-peptide in this probe.

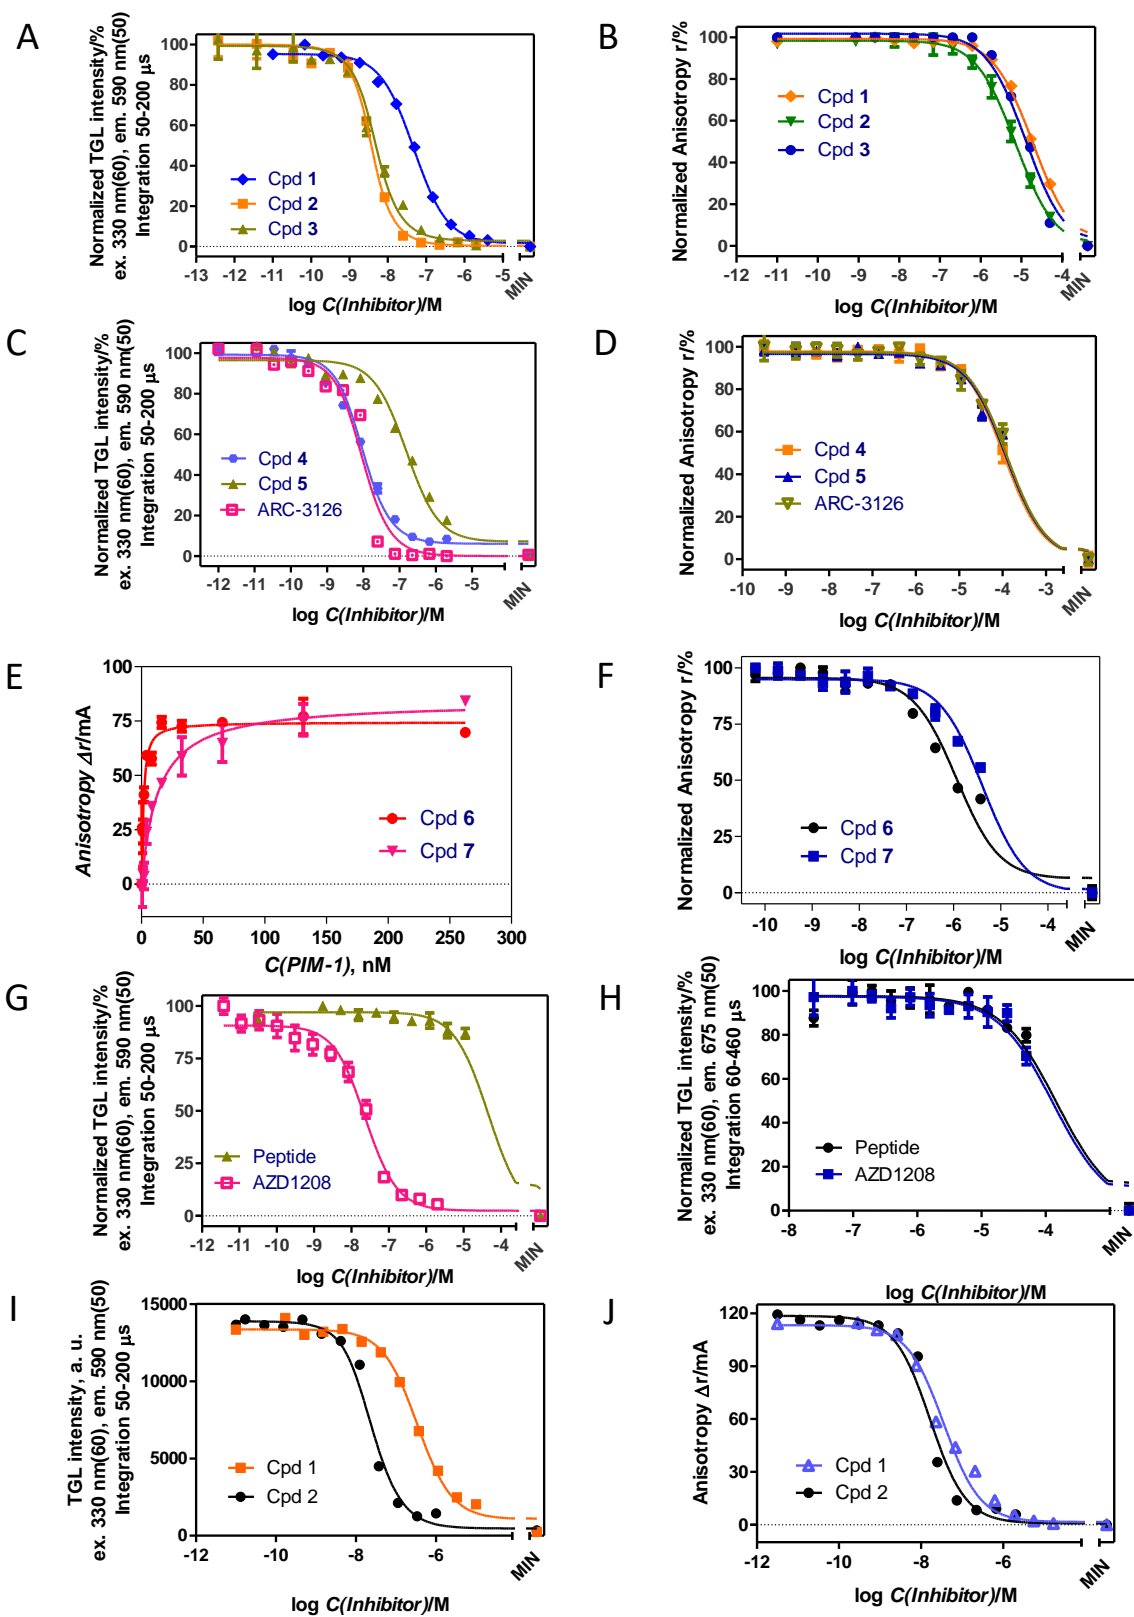

Figure S7. Biochemical characterization of the synthesized compounds and commercially available inhibitors.

(A) Displacement of ARC-1451 (2 nM) from the complex with PIM-1 (3 nM) by compound **1**, **2**, or **3**. (B) Displacement of ARC-583 (2 nM) from the complex with PKA $\alpha$  (3 nM) by **1**, **2**, or **3**. (C) Displacement of ARC-1451 (2 nM) from the complex with PIM-1 (3 nM) by **4**, **5**, or ARC-3126. (D) Displacement of ARC-583 (0.5 nM) from the complex with PKA $\alpha$  (2 nM) by **4**, **5**, or ARC-3126. (E) Binding of **6** and **7** (1.5 nM) to PIM-1. (F) Displacement of ARC-583 (0.5 nM) from the complex with PKA $\alpha$  (2 nM) by **6** and **7**. (G) Displacement of ARC-1451 (2 nM) from the complex with PIM-1 (3 nM) by PIM peptide or AZD1208. (H) Displacement of ARC-1188 (0.5 nM) from the complex with PKA $\alpha$  (3 nM) by PIM peptide or AZD1208. (I) Displacement of ARC-1451 (0.5 nM) from the complex with PIM-2 (5 nM) by **1** or **2**. (J) Displacement of ARC-1451 (2 nM) from the complex with PIM-3 (5 nM) by **1** or **2**. Mean values  $\pm$  SEM are shown (N = 2). The adenosine analogue moiety of compound **2** enhances its affinity to PIM-1 and PIM-2 (compared to compound **1**). The structural modifications performed to compound **2** allowed conservation of nanomolar affinity to PIM kinases.

### Supplementary Video

Video S1. Colocalization studies of PIM-targeting compound **6** with fluorescently tagged PIM-1 *vs* peroxisomal marker (following 48 h transfection) in live U2OS cells.

The PIM-1-mRFP (right part) and mCherry-Peroxisomes-2 (left part) are shown in green and compound **6** in red on overlaid images; Z-stack is shown as time stack (3 frames per second) for better visualization of the colocalization over the whole cell.
